# Supplementary material
Source: publisher figshare collection journal article supplement (https://adisjournals.figshare.com/ndownloader/files/39751348)
Supplement: Supplementary file 1 [file 39751348]

# Early Economic Assessment of Fecal Microbiota Transplantation (FMT) for Patients with Recurrent Urinary Tract Infections (UTI) Caused by Multidrug-Resistant Organisms (MDRO)

Olivia D. Baek, Camilla K. Hjermitsev, Line Dyreborg, Simon M. D. Baunwall, Katrine L. Høyer, Nina Rågård, Lianna H. Hammeken, Johan V. Povlsen, Lars H. Ehlers, Christian L. Hvas

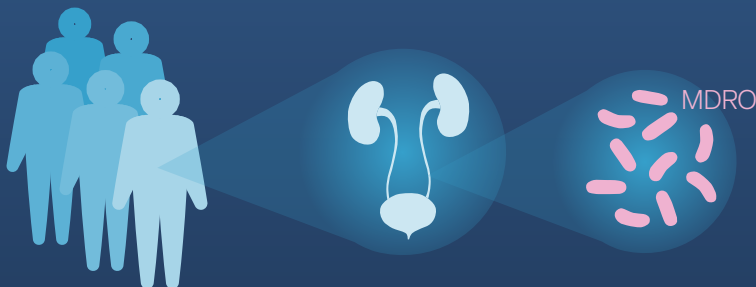

-126 days

+126 days

Pre-FMT, per patient (n=5)

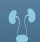

4 UTIs

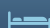

15 days in hospital

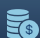

6,687 USD

Post-FMT, per patient (n=5)

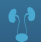

0 UTIs

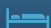

4 days in hospital

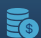

1,574 USD

Hospital admission days

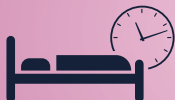

↓ 87%

Monthly hospital costs

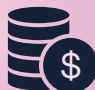

↓ 79%

PEER-REVIEWED  
FEATURE

The graphical abstract represents the opinions of the authors. For a full list of declarations, including funding and author disclosure statements, and copyright information, please see the full text online.

 Adis
